# Supplementary material for: Nitrate Removal from Groundwater by Heterotrophic and Electro-Autotrophic Denitrification
Source: MDPI journal article supplement (doi:10.3390/w14111759), 2022-05-30
Supplement: s1 [file s1]

Archive with 1 entries (1 files):
- water-1727288-supplementary.pdf
